# Supplementary material for: Cross-Sectional Transcriptional Analysis of the Aging Murine Heart
Source: Frontiers journal article supplement (doi:10.3389/fmolb.2020.565530), 2020-09-25
Supplement: Data_Sheet_1.PDF [file Data_Sheet_1.PDF]

## ***Supplementary Materials***

### **SUPPLEMENTARY DATA**

**Supplementary file 1.** Full list of genes identified as significant (adjusted  $p < 0.05$ ) by the Wald test between the 4 weeks and 15 weeks age groups. 592 genes were identified as significant by the comparison between these age groups. Shrunk log<sub>2</sub> fold changes and adjusted  $p$ -values are included for each gene.

**Supplementary file 2.** Full list of genes identified as significant (adjusted  $p < 0.05$ ) by the Wald test between the 15 weeks and 8 months age groups. 548 genes were identified as significant by the comparison between these age groups. Shrunk log<sub>2</sub> fold changes and adjusted  $p$ -values are included for each gene.

**Supplementary file 3.** Full list of genes identified as significant (adjusted  $p < 0.05$ ) by the Wald test between the 8 months and 22 months age groups. 1038 genes were identified as significant by the comparison between these age groups. Shrunk log<sub>2</sub> fold changes and adjusted  $p$ -values are included for each gene.

**Supplementary file 4.** Full list of genes identified as significant (adjusted  $p < 0.05$ ) by the likelihood ratio test (LRT) for age. 2410 genes were identified as significant by the LRT for age, of which 2390 were clustered. Cluster membership and adjusted  $p$ -values are included for each gene.

**Supplementary file 5.** Full list of genes identified as significant (adjusted  $p < 0.05$ ) by the likelihood ratio test (LRT) for age-sex interaction. 414 genes were identified as significant by the LRT for age. Adjusted  $p$ -values are included for each gene.

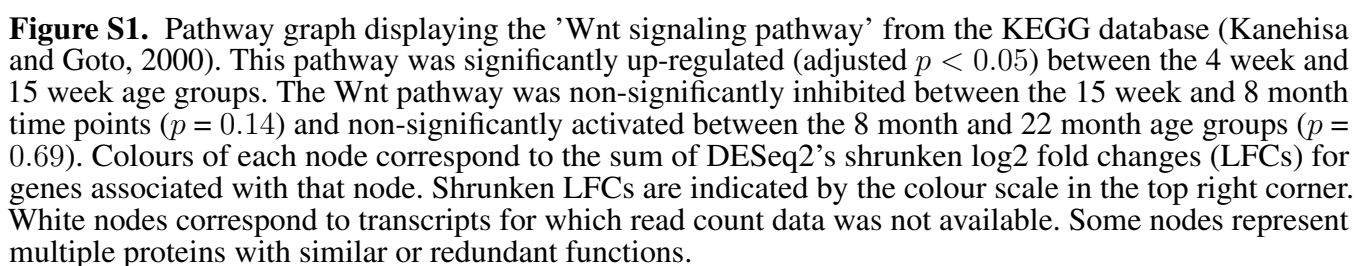





## SUPPLEMENTARY TABLES

| Gene           | log2 fold change | Adjusted <i>p</i> -value | Gene           | log2 fold change | Adjusted <i>p</i> -value |
|----------------|------------------|--------------------------|----------------|------------------|--------------------------|
| <i>Map3k4</i>  | 22.14            | $8.57 \cdot 10^{-13}$    | <i>Cerk</i>    | -25.58           | $5.94 \cdot 10^{-8}$     |
| <i>Mcm7</i>    | 22.21            | $3.51 \cdot 10^{-11}$    | <i>Ttc33</i>   | -25.38           | $6.26 \cdot 10^{-7}$     |
| <i>Mkrn2</i>   | 20.3             | $1.44 \cdot 10^{-6}$     | <i>Plec</i>    | -22.93           | $1.44 \cdot 10^{-6}$     |
| <i>Hypk</i>    | 25.19            | $4.00 \cdot 10^{-6}$     | <i>Sult1a1</i> | -23.71           | $1.44 \cdot 10^{-6}$     |
| <i>Nr2c2ap</i> | 24.61            | $6.05 \cdot 10^{-6}$     | <i>Timm10b</i> | -25.91           | $1.44 \cdot 10^{-6}$     |
| <i>Pgam5</i>   | 22.69            | $6.05 \cdot 10^{-6}$     | <i>Srpk2</i>   | -25.84           | $1.46 \cdot 10^{-6}$     |
| <i>Fkbp10</i>  | 20.31            | $6.83 \cdot 10^{-6}$     | <i>Mir27b</i>  | -25.69           | $1.69 \cdot 10^{-6}$     |
| <i>Setd1b</i>  | 24.14            | $8.47 \cdot 10^{-6}$     | <i>Pcgf5</i>   | -25.34           | $2.60 \cdot 10^{-6}$     |
| <i>Sestd1</i>  | 20.13            | $8.92 \cdot 10^{-6}$     | <i>Pam</i>     | -25.06           | $3.64 \cdot 10^{-6}$     |
| <i>Akt1</i>    | 19.78            | $9.32 \cdot 10^{-6}$     | <i>Ndel1</i>   | -24.75           | $4.97 \cdot 10^{-6}$     |
| <i>Cracr2b</i> | 23.93            | $9.32 \cdot 10^{-6}$     | <i>Ghdc</i>    | -24.31           | $6.05 \cdot 10^{-6}$     |
| <i>Mto1</i>    | 23.92            | $9.32 \cdot 10^{-6}$     | <i>Mark4</i>   | -24.42           | $6.05 \cdot 10^{-6}$     |
| <i>Zmat5</i>   | 21.26            | $9.67 \cdot 10^{-6}$     | <i>Med16</i>   | -24.43           | $6.05 \cdot 10^{-6}$     |
| <i>Pprcl</i>   | 23.85            | $9.71 \cdot 10^{-6}$     | <i>Med19</i>   | -24.33           | $6.05 \cdot 10^{-6}$     |
| <i>Tut1</i>    | 23.77            | $1.06 \cdot 10^{-5}$     | <i>Kcnh2</i>   | -24.14           | $6.83 \cdot 10^{-6}$     |
| <i>Actr8</i>   | 8.72             | $1.22 \cdot 10^{-5}$     | <i>Piezo1</i>  | -24.17           | $6.83 \cdot 10^{-6}$     |
| <i>Dmac2l</i>  | 21.39            | $1.78 \cdot 10^{-5}$     | <i>Bak1</i>    | -24.05           | $7.45 \cdot 10^{-6}$     |
| <i>Cltc</i>    | 23.24            | $1.86 \cdot 10^{-5}$     | <i>Aqr</i>     | -23.85           | $8.81 \cdot 10^{-6}$     |
| <i>Cybc1</i>   | 23.02            | $2.33 \cdot 10^{-5}$     | <i>Exoc5</i>   | -23.84           | $8.81 \cdot 10^{-6}$     |
| <i>Hba-a2</i>  | 22.22            | $2.33 \cdot 10^{-5}$     | <i>Tmbim1</i>  | -9.48            | $2.53 \cdot 10^{-5}$     |

**Table S1.** List of genes that exhibit significant up-regulation (left) or down-regulation (right) in early age. Each table includes the top 20 up- or down-regulated genes with the lowest *p*-values calculated by the Wald test between the 4 and 15 week age groups, sorted by adjusted *p*-value. The Benjamini-Hochberg multiple testing correction was used to adjust *p*-values. The *p*-values provide an indication of the magnitude of expression differences for each gene between the two time points. DESeq2's shrunken log2 fold change (LFC) for each gene is also listed.

Upregulated transcripts: *Map3k4*, mitogen-activated protein kinase kinase kinase 4; *Mcm7*, minichromosome maintenance complex component 7; *Mkrn2*, makorin, ring finger protein, 2; *Hypk*, huntingtin interacting protein K; *Nr2c2ap*, nuclear receptor 2C2-associated protein; *Pgam5*, phosphoglycerate mutase family member 5; *Fkbp10*, FK506 binding protein 10; *Setd1b*, SET domain containing 1B; *Sestd1*, SEC14 and spectrin domains 1; *Akt1*, thymoma viral proto-oncogene 1; *Cracr2b*, calcium release activated channel regulator 2B; *Mto1*, mitochondrial tRNA translation optimization 1; *Zmat5*, zinc finger, matrin type 5; *Pprcl*, peroxisome proliferative activated receptor, gamma, coactivator-related 1; *Tut1*, terminal uridylyl transferase 1, U6 snRNA-specific; *Actr8*, ARP8 actin-related protein 8; *Dmac2l*, distal membrane arm assembly complex 2 like; *Cltc*, clathrin, heavy polypeptide (Hc); *Cybc1*, cytochrome b 245 chaperone 1; *Hba-a2*, hemoglobin alpha, adult chain 2.

Downregulated transcripts: *Cerk*, ceramide kinase; *Ttc33*, tetratricopeptide repeat domain 33; *Plec*, plectin; *Sult1a1*, sulfotransferase family 1A, phenol-preferring, member 1; *Timm10b*, translocase of inner mitochondrial membrane 10B; *Srpk2*, serine/arginine-rich protein specific kinase 2; *Mir27b*, microRNA 27b; *Pcgf5*, polycomb group ring finger 5; *Pam*, peptidylglycine alpha-amidating monooxygenase; *Ndel1*, nudE neurodevelopment protein 1 like 1; *Ghdc*, GH3 domain containing; *Mark4*, MAP/microtubule affinity regulating kinase 4; *Med16*, mediator complex subunit 16; *Med19*, mediator complex subunit 19; *Kcnh2*, potassium voltage-gated channel, subfamily H (eag-related), member 2; *Piezo1*, piezo-type mechanosensitive ion channel component 1; *Bak1*, BCL2-antagonist/killer 1; *Aqr*, aquarius; *Exoc5*, exocyst complex component 5; *Tmbim1*, transmembrane BAX inhibitor motif containing 1.

| Gene           | log2 fold change | Adjusted <i>p</i> -value | Gene           | log2 fold change | Adjusted <i>p</i> -value |
|----------------|------------------|--------------------------|----------------|------------------|--------------------------|
| <i>Ptpn23</i>  | 38.02            | $3.25 \cdot 10^{-18}$    | <i>Pprc1</i>   | -39.91           | $8.25 \cdot 10^{-20}$    |
| <i>Cdpf1</i>   | 31.03            | $1.30 \cdot 10^{-16}$    | <i>Nr2c2ap</i> | -38.85           | $6.13 \cdot 10^{-19}$    |
| <i>Mir22</i>   | 33.55            | $9.39 \cdot 10^{-16}$    | <i>Akt1</i>    | -31.16           | $3.91 \cdot 10^{-18}$    |
| <i>Mir1949</i> | 34.44            | $4.13 \cdot 10^{-15}$    | <i>Mto1</i>    | -34.6            | $3.31 \cdot 10^{-15}$    |
| <i>Frmd4b</i>  | 33.81            | $1.36 \cdot 10^{-14}$    | <i>Nras</i>    | -32.07           | $4.13 \cdot 10^{-15}$    |
| <i>Snf8</i>    | 30.14            | $2.35 \cdot 10^{-14}$    | <i>Nadk2</i>   | -33.92           | $1.13 \cdot 10^{-14}$    |
| <i>Htra2</i>   | 31.28            | $3.74 \cdot 10^{-12}$    | <i>Cxcl9</i>   | -32.82           | $8.80 \cdot 10^{-14}$    |
| <i>Cerk</i>    | 25.99            | $1.46 \cdot 10^{-10}$    | <i>Zmat5</i>   | -28.98           | $1.36 \cdot 10^{-13}$    |
| <i>Ttc33</i>   | 26.66            | $5.00 \cdot 10^{-10}$    | <i>Gbp9</i>    | -32.25           | $2.63 \cdot 10^{-13}$    |
| <i>Net1</i>    | 27.51            | $1.53 \cdot 10^{-9}$     | <i>Scyl1</i>   | -31.18           | $2.21 \cdot 10^{-12}$    |
| <i>Sult1a1</i> | 25.0             | $2.12 \cdot 10^{-9}$     | <i>Hypk</i>    | -29.95           | $2.15 \cdot 10^{-11}$    |
| <i>Pam</i>     | 26.51            | $8.44 \cdot 10^{-9}$     | <i>Guk1</i>    | -28.29           | $4.45 \cdot 10^{-10}$    |
| <i>Ndel1</i>   | 26.14            | $1.47 \cdot 10^{-8}$     | <i>Mrrf</i>    | -23.83           | $1.34 \cdot 10^{-9}$     |
| <i>Ghdc</i>    | 25.74            | $2.60 \cdot 10^{-8}$     | <i>Tut1</i>    | -26.96           | $4.03 \cdot 10^{-9}$     |
| <i>Mir26b</i>  | 25.47            | $3.86 \cdot 10^{-8}$     | <i>Izumo4</i>  | -26.55           | $8.14 \cdot 10^{-9}$     |
| <i>Smg9</i>    | 7.97             | $7.91 \cdot 10^{-8}$     | <i>Sppl3</i>   | -25.96           | $1.11 \cdot 10^{-8}$     |
| <i>Atmin</i>   | 9.19             | $1.00 \cdot 10^{-7}$     | <i>Slc39a9</i> | -26.31           | $1.13 \cdot 10^{-8}$     |
| <i>Rtl8c</i>   | 10.11            | $1.03 \cdot 10^{-7}$     | <i>E4f1</i>    | -26.08           | $1.57 \cdot 10^{-8}$     |
| <i>Med16</i>   | 24.68            | $1.19 \cdot 10^{-7}$     | <i>Adprm</i>   | -21.6            | $1.70 \cdot 10^{-8}$     |
| <i>Exoc5</i>   | 24.2             | $2.41 \cdot 10^{-7}$     | <i>Cracr2b</i> | -25.9            | $2.05 \cdot 10^{-8}$     |

**Table S2.** List of genes that exhibit significant up-regulation (left) or down-regulation (right) between adolescence (15 weeks) and adulthood (8 months). Each table includes the top 20 up- or down-regulated genes with the lowest *p*-values calculated by Wald test between the 15 week and 8 month age groups, sorted by adjusted *p*-value. Benjamini-Hochberg multiple testing correction was used to adjust *p*-values. The *p*-values provide an indication of the magnitude of expression differences for each gene between the two time points. DESeq2's shrunken log2 fold change (LFC) for each gene is also listed.

Upregulated transcripts: *Ptpn23*, protein tyrosine phosphatase, non-receptor type 23; *Cdpf1*, cysteine rich, DPF motif domain containing 1; *Mir22*, microRNA 22; *Mir1949*, microRNA 1949; *Frmd4b*, FERM domain containing 4B; *Snf8*, SNF8, ESCRT-II complex subunit, homolog (S. cerevisiae); *Htra2*, HtrA serine peptidase 2; *Cerk*, ceramide kinase; *Ttc33*, tetratricopeptide repeat domain 33; *Net1*, neuroepithelial cell transforming gene 1; *Sult1a1*, sulfotransferase family 1A, phenol-preferring, member 1; *Pam*, peptidylglycine alpha-amidating monooxygenase; *Ndel1*, nudE neurodevelopment protein 1 like 1; *Ghdc*, GH3 domain containing; *Mir26b*, microRNA 26b; *Smg9*, smg-9 homolog, nonsense mediated mRNA decay factor (C. elegans); *Atmin*, ATM interactor; *Rtl8c*, retrotransposon Gag like 8C; *Med16*, mediator complex subunit 16; *Exoc5*, exocyst complex component 5.

Downregulated transcripts: *Pprc1*, peroxisome proliferative activated receptor, gamma, coactivator-related 1; *Nr2c2ap*, nuclear receptor 2C2-associated protein; *Akt1*, thymoma viral proto-oncogene 1; *Mto1*, mitochondrial tRNA translation optimization 1; *Nras*, neuroblastoma ras oncogene; *Nadk2*, NAD kinase 2, mitochondrial; *Cxcl9*, chemokine (C-X-C motif) ligand 9; *Zmat5*, zinc finger, matrin type 5; *Gbp9*, guanylate-binding protein 9; *Scyl1*, SCY1-like 1 (S. cerevisiae); *Hypk*, huntingtin interacting protein K; *Guk1*, guanylate kinase 1; *Mrrf*, mitochondrial ribosome recycling factor; *Tut1*, terminal uridylyl transferase 1, U6 snRNA-specific; *Izumo4*, IZUMO family member 4; *Sppl3*, signal peptide peptidase 3; *Slc39a9*, solute carrier family 39 (zinc transporter), member 9; *E4f1*, E4F transcription factor 1; *Adprm*, ADP-ribose/CDP-alcohol diphosphatase, manganese dependent; *Cracr2b*, calcium release activated channel regulator 2B.



| Gene           | log2 fold change | Adjusted <i>p</i> -value | Gene             | log2 fold change | Adjusted <i>p</i> -value |
|----------------|------------------|--------------------------|------------------|------------------|--------------------------|
| <i>Akt1</i>    | 33.38            | $2.34 \cdot 10^{-18}$    | <i>Mcm7</i>      | -33.58           | $3.38 \cdot 10^{-28}$    |
| <i>Pprc1</i>   | 39.06            | $5.55 \cdot 10^{-17}$    | <i>Fkbp10</i>    | -39.61           | $8.94 \cdot 10^{-25}$    |
| <i>Nras</i>    | 32.99            | $6.00 \cdot 10^{-14}$    | <i>Mageb2</i>    | -26.19           | $3.93 \cdot 10^{-23}$    |
| <i>Gbp9</i>    | 33.19            | $3.23 \cdot 10^{-12}$    | <i>Efnb1</i>     | -26.4            | $9.29 \cdot 10^{-22}$    |
| <i>Nr2c2ap</i> | 32.81            | $6.67 \cdot 10^{-12}$    | <i>Pdzd11</i>    | -24.63           | $7.65 \cdot 10^{-19}$    |
| <i>Mto1</i>    | 32.23            | $1.50 \cdot 10^{-11}$    | <i>Mageb1</i>    | -24.44           | $2.53 \cdot 10^{-17}$    |
| <i>Zmat5</i>   | 28.32            | $2.56 \cdot 10^{-11}$    | <i>Yipf6</i>     | -24.3            | $5.46 \cdot 10^{-17}$    |
| <i>Nadk2</i>   | 31.81            | $2.69 \cdot 10^{-11}$    | <i>Rn7s1</i>     | -24.39           | $1.00 \cdot 10^{-15}$    |
| <i>Cxcl9</i>   | 31.15            | $7.46 \cdot 10^{-11}$    | <i>Stard8</i>    | -24.24           | $1.59 \cdot 10^{-15}$    |
| <i>Scyl1</i>   | 31.06            | $8.69 \cdot 10^{-11}$    | <i>Mir223</i>    | -23.8            | $2.10 \cdot 10^{-14}$    |
| <i>Izumo4</i>  | 28.86            | $2.16 \cdot 10^{-9}$     | <i>Las1l</i>     | -22.46           | $2.16 \cdot 10^{-14}$    |
| <i>Mrrf</i>    | 24.52            | $3.68 \cdot 10^{-9}$     | <i>Dnmt1</i>     | -21.69           | $1.87 \cdot 10^{-13}$    |
| <i>Selenok</i> | 10.1             | $2.86 \cdot 10^{-8}$     | <i>Hba-a2</i>    | -33.89           | $1.89 \cdot 10^{-13}$    |
| <i>Nup37</i>   | 24.27            | $4.77 \cdot 10^{-8}$     | <i>Rpl17-ps8</i> | -21.32           | $9.43 \cdot 10^{-13}$    |
| <i>E4f1</i>    | 25.8             | $1.56 \cdot 10^{-7}$     | <i>Hdac7</i>     | -22.82           | $1.52 \cdot 10^{-12}$    |
| <i>Adprm</i>   | 21.35            | $1.58 \cdot 10^{-7}$     | <i>Foxo4</i>     | -23.38           | $2.99 \cdot 10^{-12}$    |
| <i>Sppl3</i>   | 25.39            | $1.59 \cdot 10^{-7}$     | <i>Ddx3y</i>     | -33.45           | $3.48 \cdot 10^{-12}$    |
| <i>Prelid1</i> | 23.72            | $1.72 \cdot 10^{-7}$     | <i>Tspan9</i>    | -32.93           | $7.99 \cdot 10^{-12}$    |
| <i>Usp16</i>   | 25.32            | $2.74 \cdot 10^{-7}$     | <i>Xkrx</i>      | -28.93           | $8.26 \cdot 10^{-12}$    |
| <i>Vsig2</i>   | 23.11            | $3.43 \cdot 10^{-7}$     | <i>Gprasp2</i>   | -22.59           | $2.69 \cdot 10^{-11}$    |

**Table S3.** List of genes that exhibit significant up-regulation (left) or down-regulation (right) in old age. Each table includes the top 20 up- and down-regulated genes with the lowest *p*-values calculated by Wald test between the 8 month and 22 month age groups, sorted by adjusted *p*-value. The Benjamini-Hochberg multiple testing correction was used to adjust *p*-values. The *p*-values provide an indication of the magnitude of expression differences for each gene between the two time points. DESeq2's shrunken log2 fold change (LFC) for each gene is also listed.

Upregulated transcripts: *Akt1*, thymoma viral proto-oncogene 1; *Pprc1*, peroxisome proliferative activated receptor, gamma, coactivator-related 1; *Nras*, neuroblastoma ras oncogene; *Gbp9*, guanylate-binding protein 9; *Nr2c2ap*, nuclear receptor 2C2-associated protein; *Mto1*, mitochondrial tRNA translation optimization 1; *Zmat5*, zinc finger, matrin type 5; *Nadk2*, NAD kinase 2, mitochondrial; *Cxcl9*, chemokine (C-X-C motif) ligand 9; *Scyl1*, SCY1-like 1 (*S. cerevisiae*); *Izumo4*, IZUMO family member 4; *Mrrf*, mitochondrial ribosome recycling factor; *Selenok*, selenoprotein K; *Nup37*, nucleoporin 37; *E4f1*, E4F transcription factor 1; *Adprm*, ADP-ribose/CDP-alcohol diphosphatase, manganese dependent; *Sppl3*, signal peptide peptidase 3; *Prelid1*, PRELI domain containing 1; *Usp16*, ubiquitin specific peptidase 16; *Vsig2*, V-set and immunoglobulin domain containing 2.

Downregulated transcripts: *Mcm7*, minichromosome maintenance complex component 7; *Fkbp10*, FK506 binding protein 10; *Mageb2*, melanoma antigen, family B, 2; *Efnb1*, ephrin B1; *Pdzd11*, PDZ domain containing 11; *Mageb1*, melanoma antigen, family B, 1; *Yipf6*, Yip1 domain family, member 6; *Rn7s1*, 7S RNA 1; *Stard8*, START domain containing 8; *Mir223*, microRNA 223; *Las1l*, LAS1-like (*S. cerevisiae*); *Dnmt1*, DNA methyltransferase (cytosine-5) 1; *Hba-a2*, hemoglobin alpha, adult chain 2; *Rpl17-ps8*, ribosomal protein L17, pseudogene 8; *Hdac7*, histone deacetylase 7; *Foxo4*, forkhead box O4; *Ddx3y*, DEAD (Asp-Glu-Ala-Asp) box polypeptide 3, Y-linked; *Tspan9*, tetraspanin 9; *Xkrx*, X-linked Kx blood group related, X-linked; *Gprasp2*, G protein-coupled receptor associated sorting protein 2.

| Ontology | Description                                                    | Adjusted <i>p</i> -value | DE genes                                                                                                                                                 |
|----------|----------------------------------------------------------------|--------------------------|----------------------------------------------------------------------------------------------------------------------------------------------------------|
| BP       | protein localization to cell periphery                         | 0.029                    | <i>Exoc5, Akt1, Cltc, Tmbim1, Ank1, Rock1, Mrap, Pid1, Camk2d, Snap23, Ppil2, Lyplal1, Mal, Lgals3, Gsk3b, Ankrd9, Myadm</i>                             |
| BP       | negative regulation of protein localization to plasma membrane | 0.029                    | <i>Cltc, Tmbim1, Mrap, Pid1, Lyplal1</i>                                                                                                                 |
| BP       | negative regulation of protein localization to cell periphery  | 0.030                    | <i>Cltc, Tmbim1, Mrap, Pid1, Lyplal1</i>                                                                                                                 |
| BP       | respiratory burst                                              | 0.030                    | <i>Cybc1, Cyba, Insr, Selenok, Bcr</i>                                                                                                                   |
| BP       | negative regulation of cellular protein localization           | 0.030                    | <i>Cltc, Tmbim1, Fbxo4, Tax1bp3, Mrap, Flcn, Pid1, Lyplal1, Gsk3b</i>                                                                                    |
| CC       | ubiquitin ligase complex                                       | 0.0005                   | <i>Pcgf5, Glmn, Fbxo4, Anapc5, Dcaf1, Fbxw5, Dcun1d5, Traf2, Ube4b, Spsb2, Cand1, Ube2d2a, Med11, Depdc5, Rnf7, Dcaf12l1, Mklml</i>                      |
| CC       | Cul4-RING E3 ubiquitin ligase complex                          | 0.018                    | <i>Glmn, Dcaf1, Fbxw5, Rnf7, Dcaf12l1</i>                                                                                                                |
| CC       | cullin-RING ubiquitin ligase complex                           | 0.018                    | <i>Glmn, Fbxo4, Anapc5, Dcaf1, Fbxw5, Spsb2, Cand1, Depdc5, Rnf7, Dcaf12l1</i>                                                                           |
| CC       | vesicle coat                                                   | 0.019                    | <i>Cltc, Scyl1, Aplg1, Cltb, Tmed3, Ap2s1</i>                                                                                                            |
| CC       | hemidesmosome                                                  | 0.022                    | <i>Plec, Dst, Itga6</i>                                                                                                                                  |
| MF       | protein serine/threonine kinase activity                       | 0.002                    | <i>Map3k4, Srpk2, Mark4, Akt1, Nme2, Dcaf1, Rock1, Sik3, Bckdk, Grk3, Eif2ak1, Bcr, Pak4, Camk2d, Pdk2, Cpne3, Mapkapk3, Gsk3b, Csnk2b, Haspin, Wnk1</i> |
| MF       | 14-3-3 protein binding                                         | 0.015                    | <i>Srpk2, Akt1, Ppp1r12a, Dab2ip, Hdac7</i>                                                                                                              |
| MF       | ubiquitin protein ligase activity                              | 0.026                    | <i>Fbxo4, Anapc5, Chfr, Traf6, D7Ertd443e, Ube4b, Nosip, Siah2, Mycbp2, Med11, Ppil2, Rnf7</i>                                                           |
| MF       | ubiquitin-like protein ligase activity                         | 0.026                    | <i>Fbxo4, Anapc5, Chfr, Traf6, D7Ertd443e, Ube4b, Nosip, Siah2, Mycbp2, Med11, Ppil2, Rnf7</i>                                                           |
| MF       | ubiquitin-protein transferase activity                         | 0.043                    | <i>Fbxo4, Anapc5, Chfr, Traf6, D7Ertd443e, Traf2, Ube4b, Nosip, Trim8, Siah2, Ube2d2a, Mycbp2, Med11, Ppil2, Rnf7</i>                                    |

**Table S4.** List of gene ontologies (GO) that exhibit significant enrichment between the 4 week and 15 week age groups (adjusted *p*-value < 0.05). GO enrichment analysis was performed using the R package clusterProfiler (Yu et al., 2012). The left-most column indicates the type of subontology to which each GO belongs: BP (biological process), MF (molecular function), or CC (cellular compartment). For each subontology, the five GOs with the lowest *p*-values are displayed. The DE genes listed in the right-most column are the genes belonging to each ontology that were identified as differentially-expressed by the Wald test (adjusted *p*-value < 0.05).



| Ontology | Description                                                   | Adjusted <i>p</i> -value | DE genes                                                                                                                                                |
|----------|---------------------------------------------------------------|--------------------------|---------------------------------------------------------------------------------------------------------------------------------------------------------|
| BP       | regulation of endoplasmic reticulum unfolded protein response | 0.015                    | <i>Bak1, Xbp1, Tmem33, Ptpn1, Nck1</i>                                                                                                                  |
| BP       | mitochondrion organization                                    | 0.015                    | <i>Akt1, Htra2, Rhot2, Bak1, Prelid1, P2rx7, Pid1, Ndubf7, Ndufs5, Bcs1l, Myc, Sdhaf2, Cox17, Ndufaf8, Smurf1, Ndufa3, Dmac2, Col4a3bp, Tspo, Hspa4</i> |
| BP       | mitochondrial respiratory chain complex assembly              | 0.015                    | <i>Ndubf7, Ndufs5, Bcs1l, Sdhaf2, Cox17, Ndufaf8, Ndufa3, Dmac2</i>                                                                                     |
| BP       | NADH dehydrogenase complex assembly                           | 0.027                    | <i>Ndubf7, Ndufs5, Bcs1l, Ndufaf8, Ndufa3, Dmac2</i>                                                                                                    |
| BP       | mitochondrial respiratory chain complex I assembly            | 0.027                    | <i>Ndubf7, Ndufs5, Bcs1l, Ndufaf8, Ndufa3, Dmac2</i>                                                                                                    |
| CC       | mitochondrial intermembrane space                             | 0.005                    | <i>Htra2, Timm10b, Prelid1, Gatm, Ndubf7, Cox17, Micu1, Hax1</i>                                                                                        |
| CC       | organelle envelope lumen                                      | 0.008                    | <i>Htra2, Timm10b, Prelid1, Gatm, Ndubf7, Cox17, Micu1, Hax1</i>                                                                                        |
| CC       | organelle inner membrane                                      | 0.028                    | <i>Timm10b, Rhot2, Ndubf4, Noa1, Cox15, Lgals3, Cox5a, P2rx7, Gatm, Dpy19l3, Ndubf7, Slc25a1, Ndufs5, Bcs1l, Micu1, Ndufa3, Dmac2, Itpr1</i>            |
| CC       | oligosaccharyltransferase complex                             | 0.028                    | <i>Dad1, Krtcap2, Ddost</i>                                                                                                                             |
| CC       | mitochondrial membrane part                                   | 0.028                    | <i>Timm10b, Rhot2, Ndubf4, Noa1, Bak1, Cox5a, Ndubf7, Ndufs5, Micu1, Ndufa3, Dmac2</i>                                                                  |
| MF       | protein C-terminus binding                                    | 0.004                    | <i>Snf8, Tax1bp3, Ercc1, Ap1g1, Dapk3, Grip2, Ube2i, Epb41, Procr, Pex16, Mif4gd, Atp1b1, Itpr1, Ptk2b</i>                                              |
| MF       | ubiquitin protein ligase binding                              | 0.039                    | <i>Nploc4, Kcnh2, Xbp1, Glmn, Ube2k, Cacul1, Psmd1, Myc, Traf6, Vcl, Actg1, Ptk2b, Slf1, Cul9</i>                                                       |
| MF       | ubiquitin-like protein ligase binding                         | 0.048                    | <i>Nploc4, Kcnh2, Xbp1, Glmn, Ube2k, Cacul1, Psmd1, Myc, Traf6, Vcl, Actg1, Ptk2b, Slf1, Cul9</i>                                                       |

**Table S5.** List of gene ontologies (GO) that exhibit significant enrichment between the 15 week and 8 month age groups (adjusted *p*-value < 0.05). GO enrichment analysis was performed using the R package clusterProfiler(Yu et al., 2012). The left-most column indicates the type of subontology to which each GO belongs: BP (biological process), MF (molecular function), or CC (cellular compartment). For each subontology, the five GOs with the lowest *p*-values are displayed. The DE genes listed in the right-most column are the genes belonging to each ontology that were identified as differentially-expressed by the Wald test (adjusted *p*-value < 0.05).
